# Supplementary material
Source: publisher figshare collection journal article supplement (https://tandf.figshare.com/articles/dataset/_/8188619)

$\beta_0(\tau)$ 

Case 5

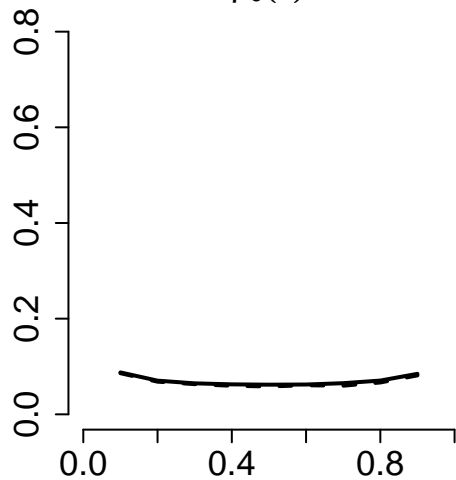 $\beta_1(\tau)$ 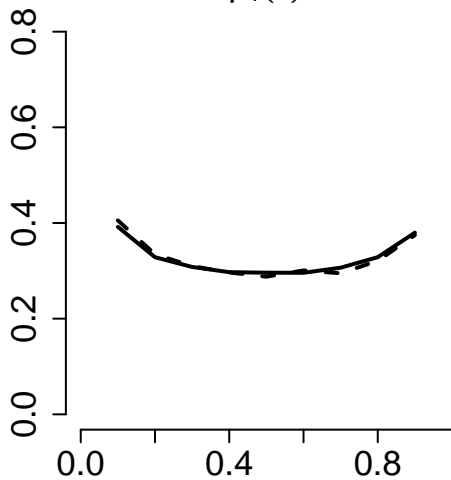 $\beta_2(\tau)$ 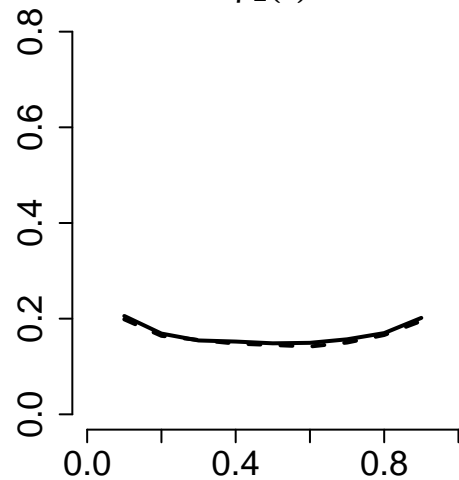

Case 6

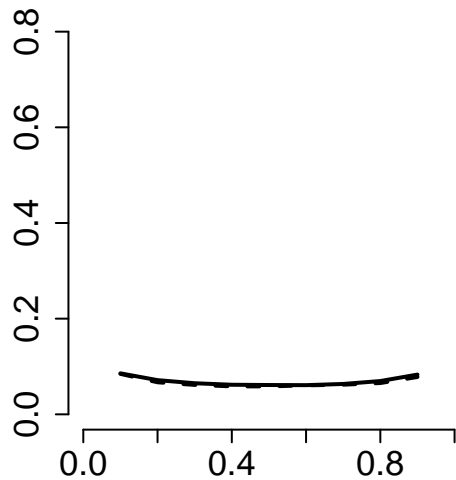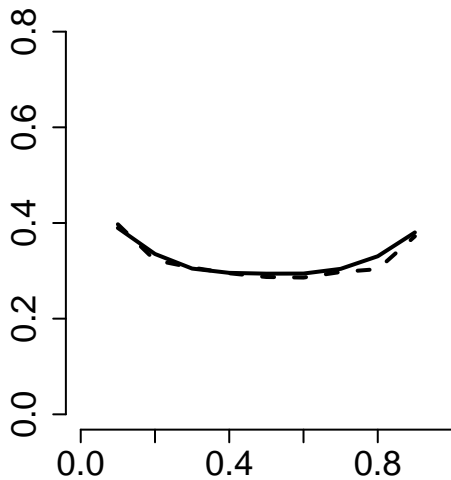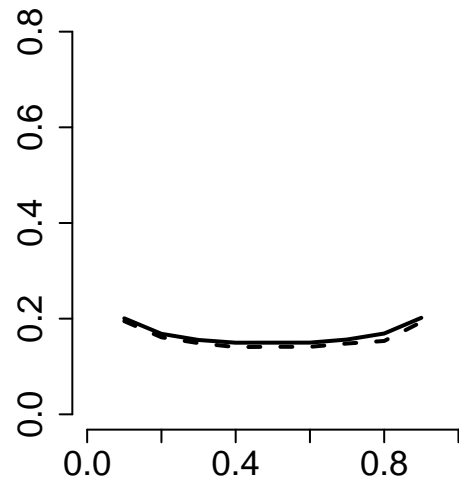

Supplement: Supplementary file 1 [file 1]

$\beta_0(\tau)$ 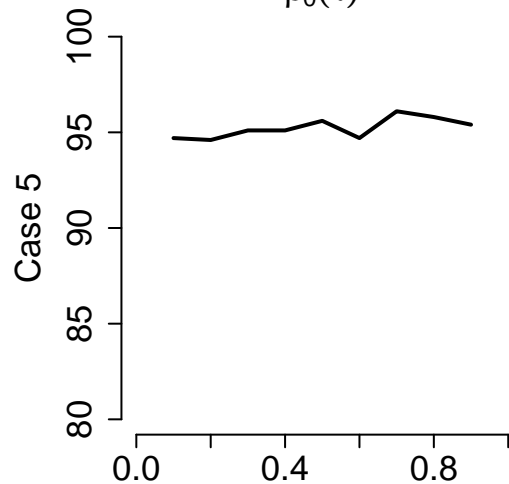 $\beta_1(\tau)$ 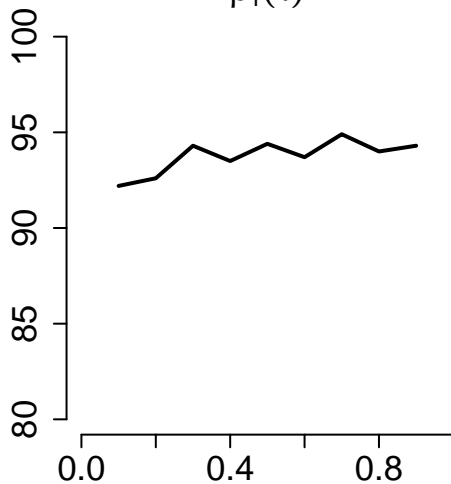 $\beta_2(\tau)$ 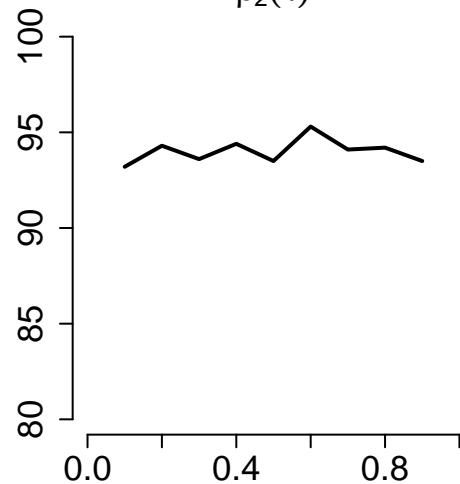

Case 6

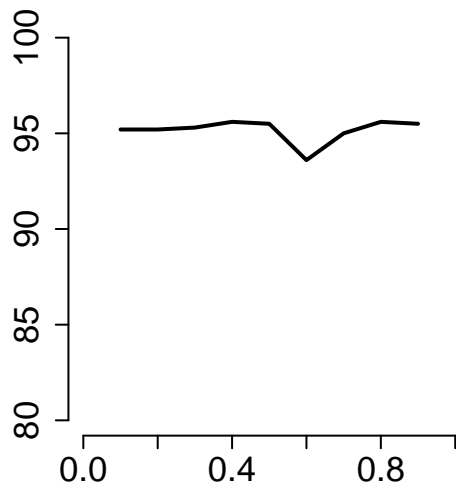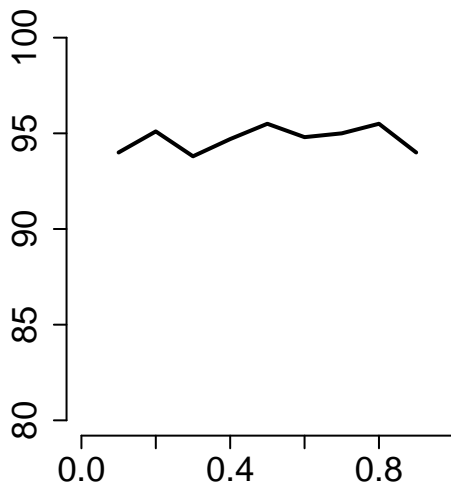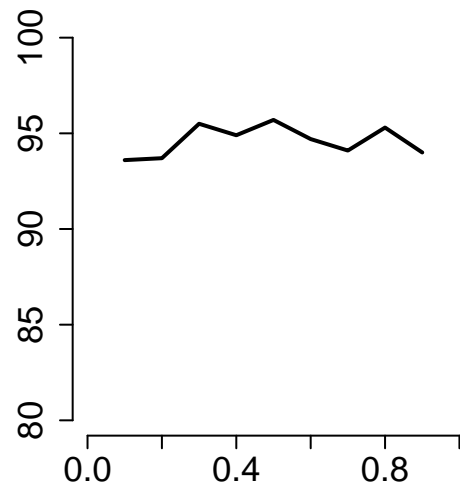

Supplement: Supplementary file 2 [file 1]

$\beta_0(\tau)$ 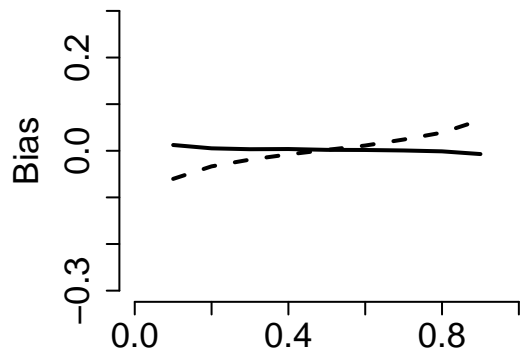 $\beta_1(\tau)$ 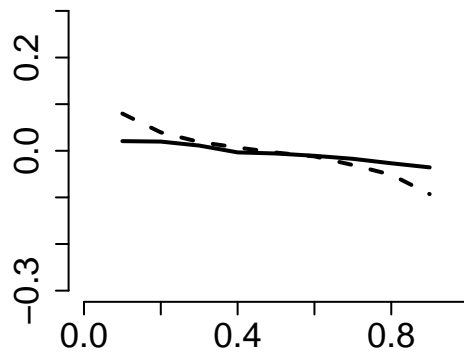 $\beta_2(\tau)$ 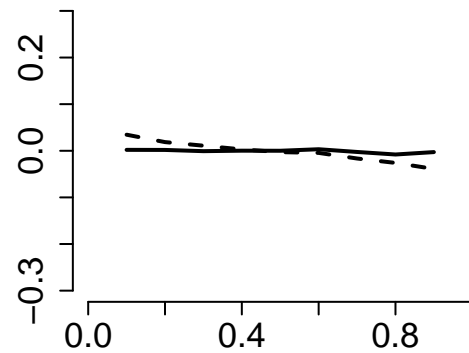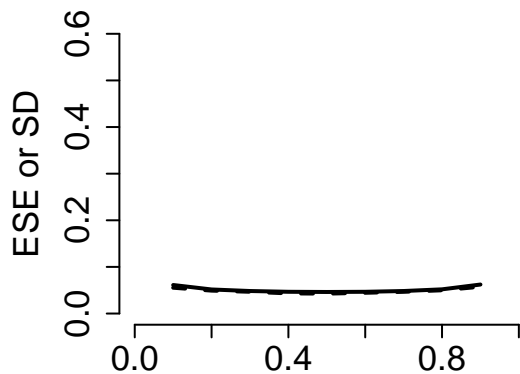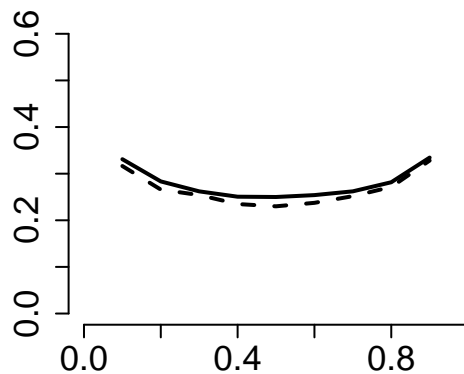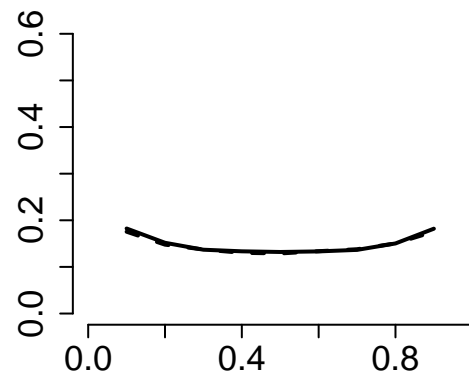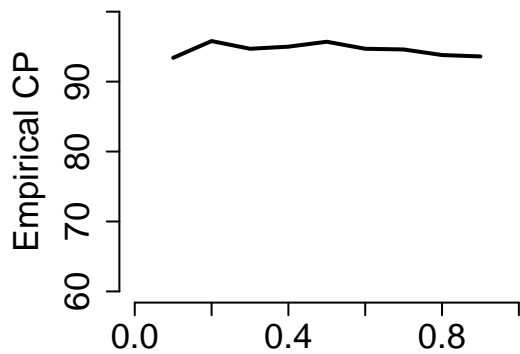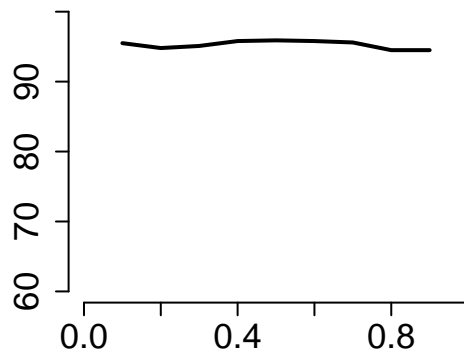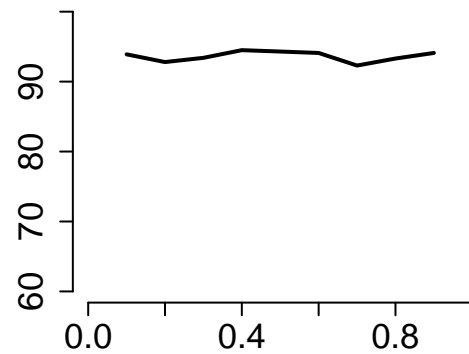

Supplement: Supplementary file 3 [file 1]

$\beta_0(\tau)$ 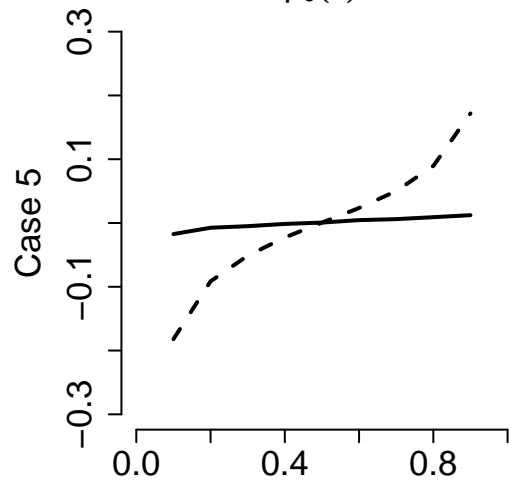 $\beta_1(\tau)$ 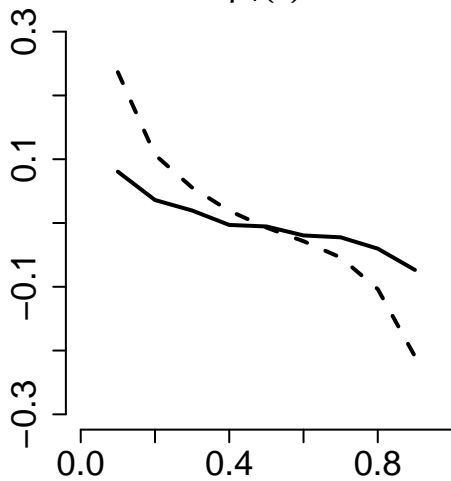 $\beta_2(\tau)$ 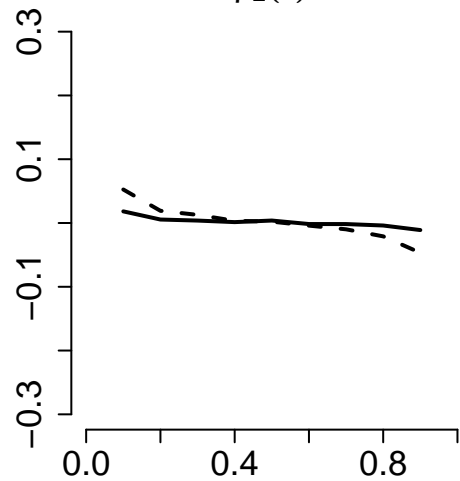

Case 6

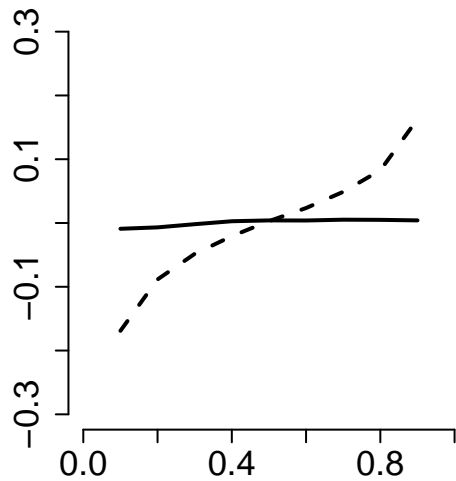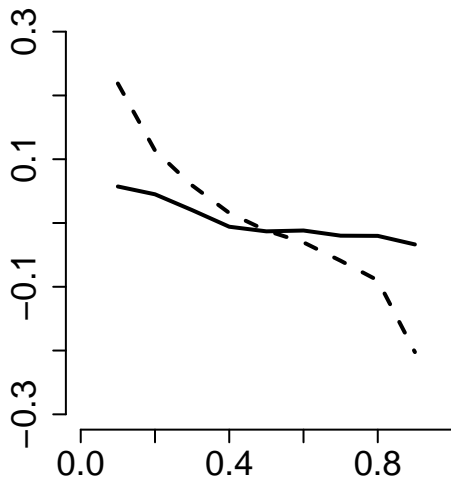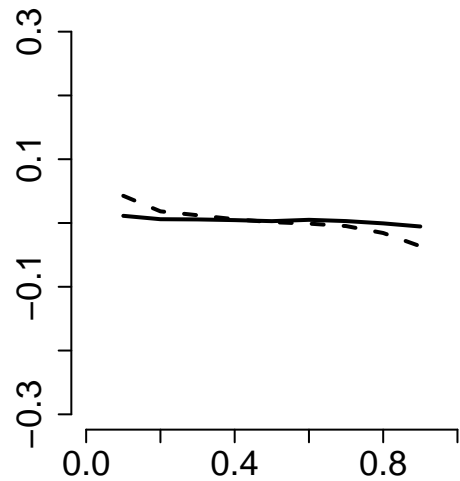

Supplement: Supplementary file 4 [file 1]

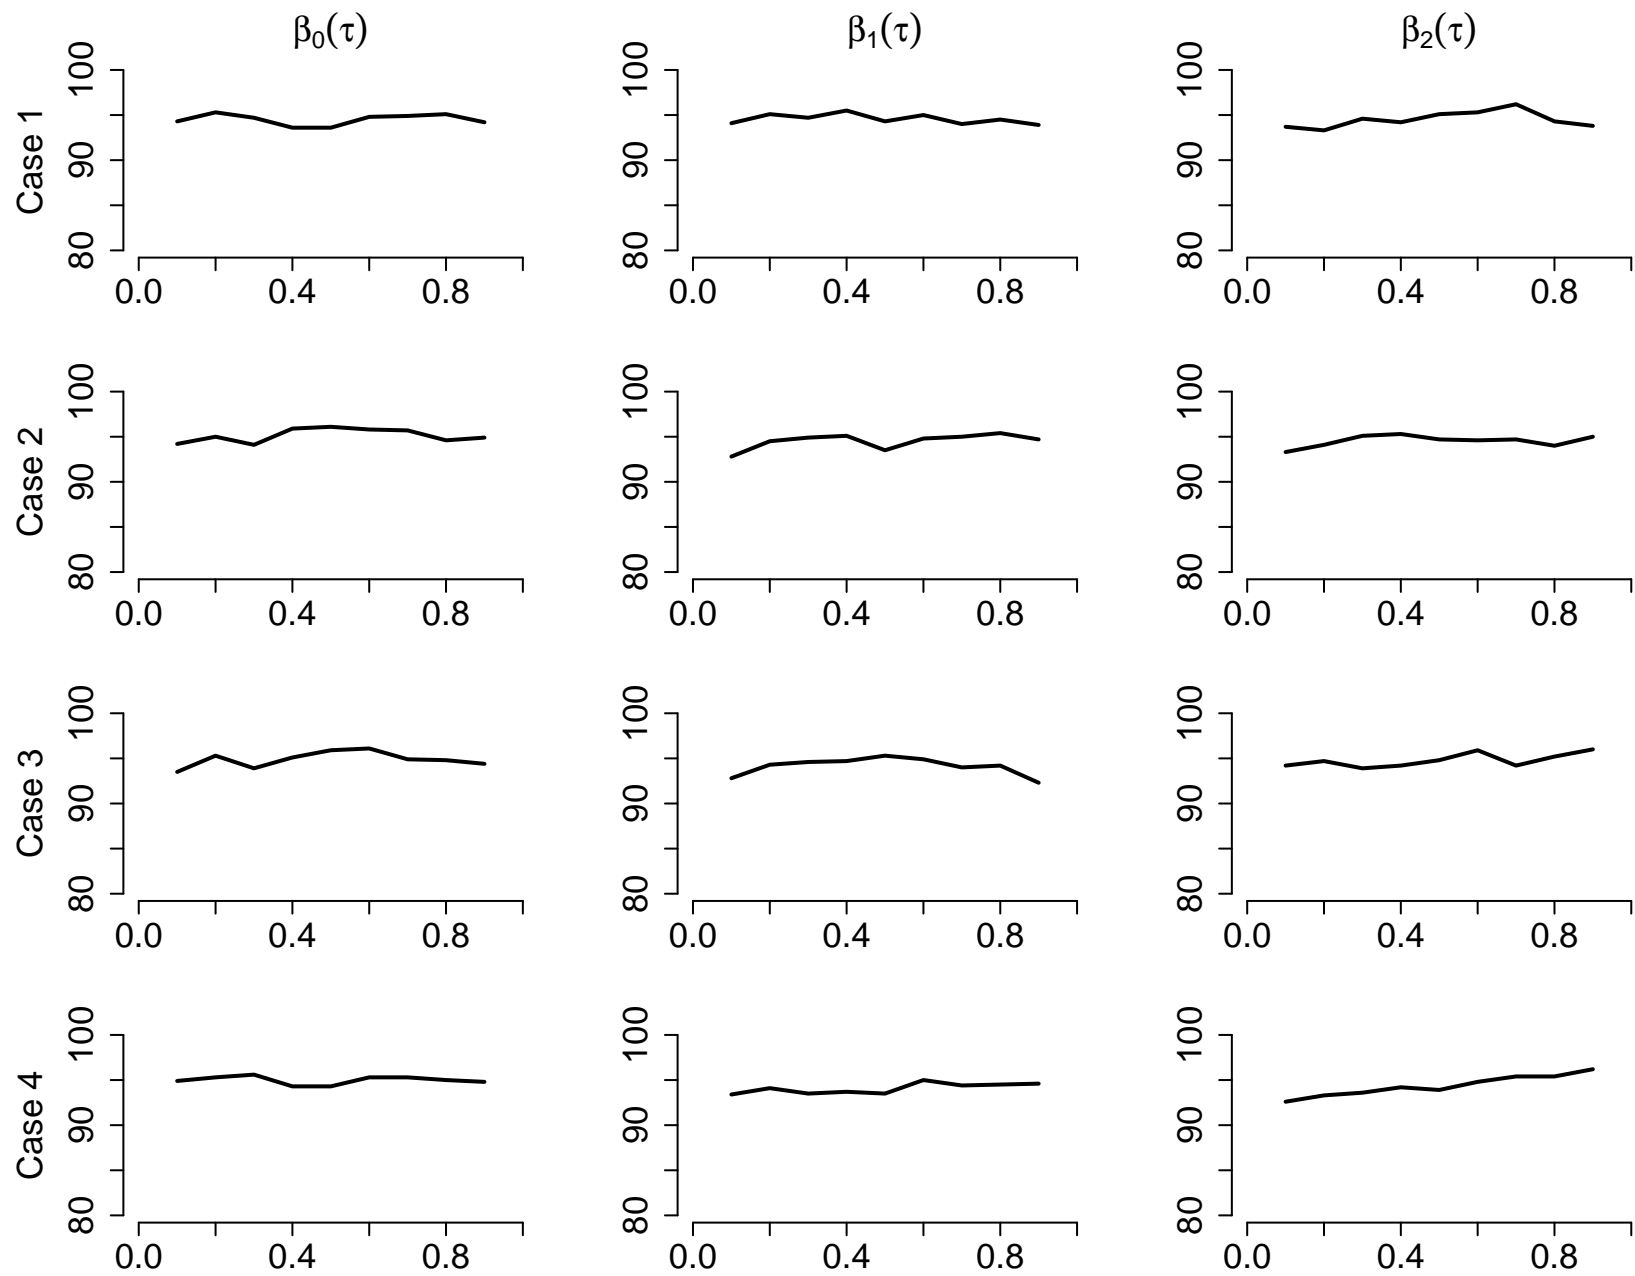

Supplement: Supplementary file 5 [file 1]

**therapy+interaction**

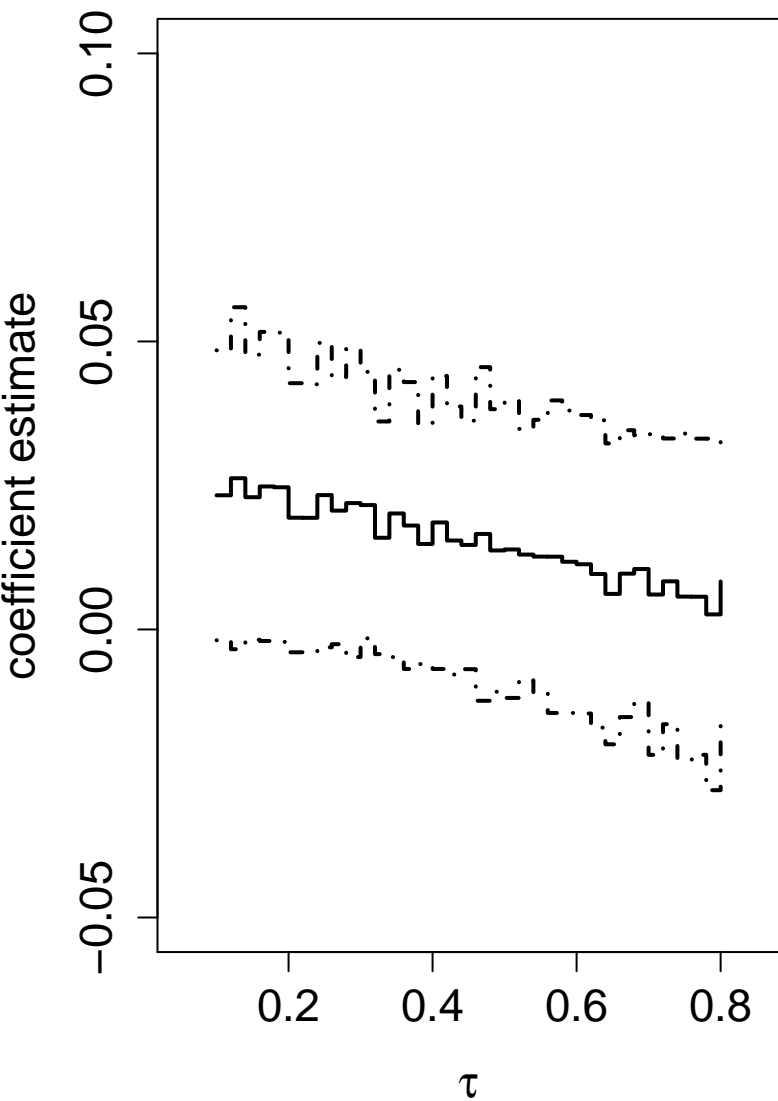

**sulfouse+interaction**

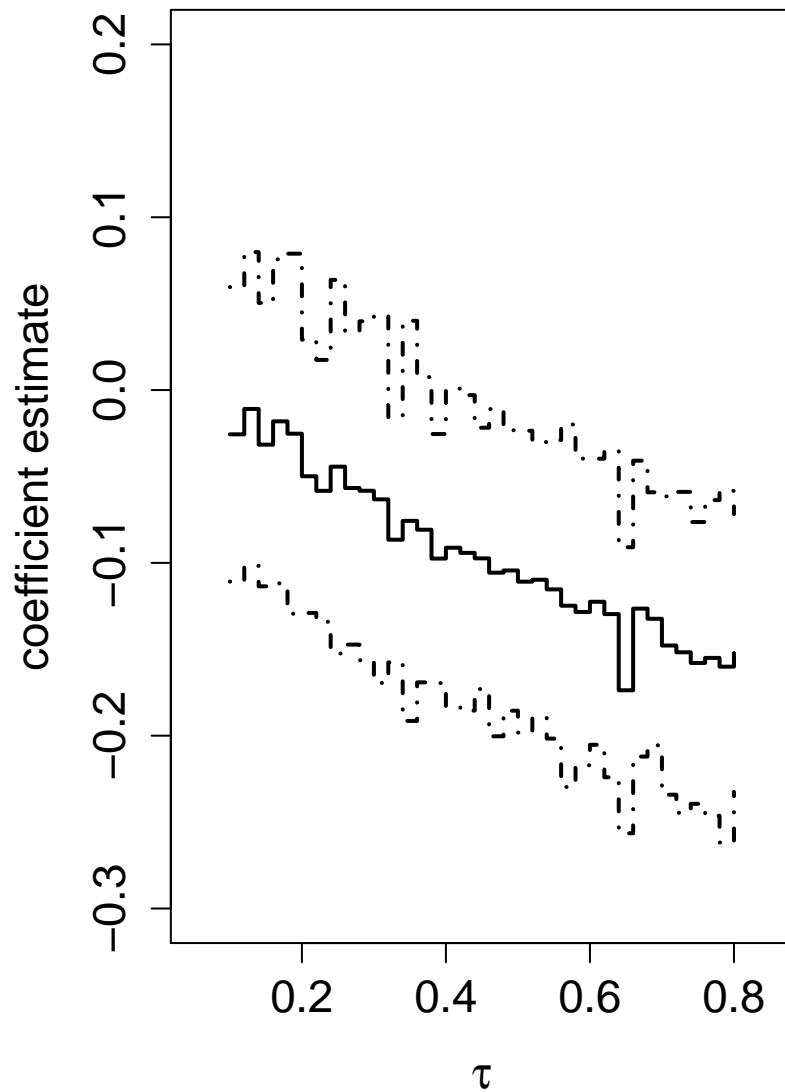

Supplement: Supplementary file 6 [file 1]

$\beta_0(\tau)$ 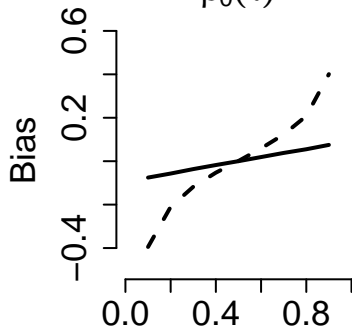 $\beta_1(\tau)$ 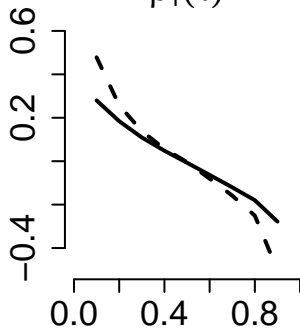 $\beta_2(\tau)$ 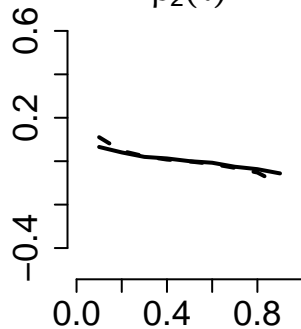

ESE or SD

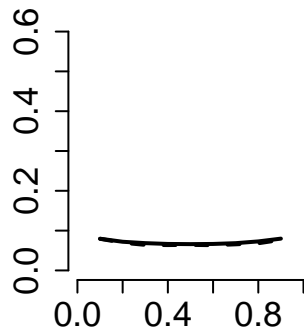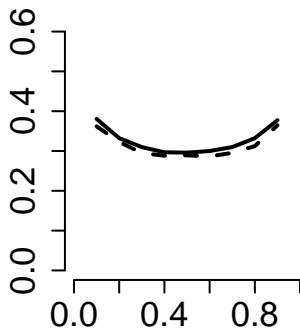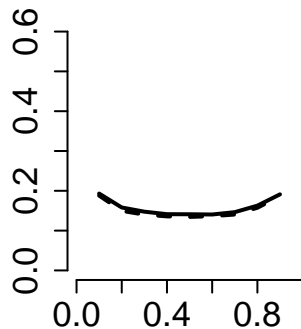

Empirical CP

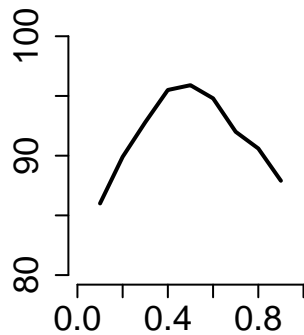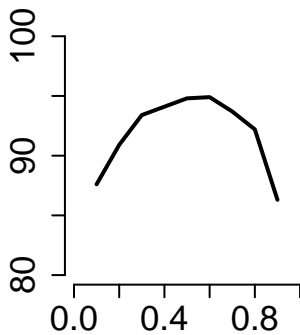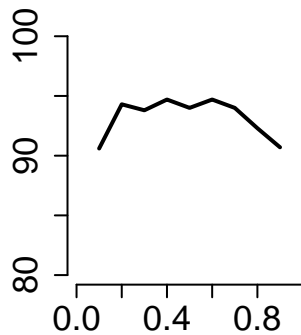

Supplement: Supplementary file 7 [file 1]

**intercept**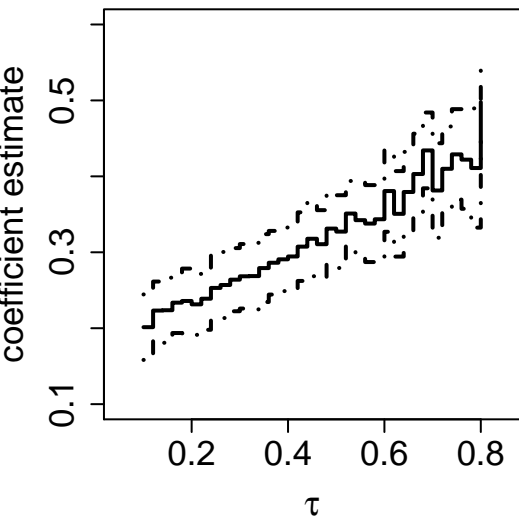**therapy**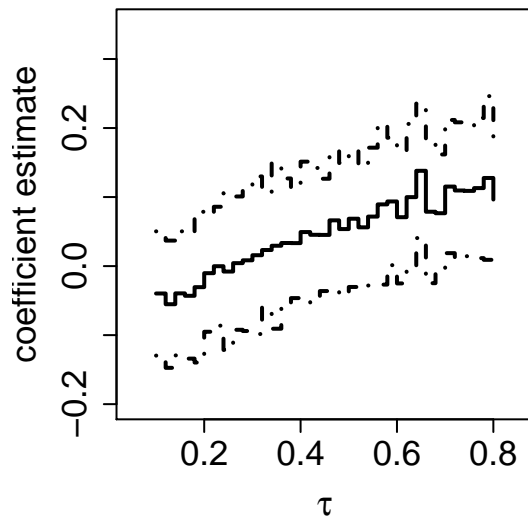**sulfouse**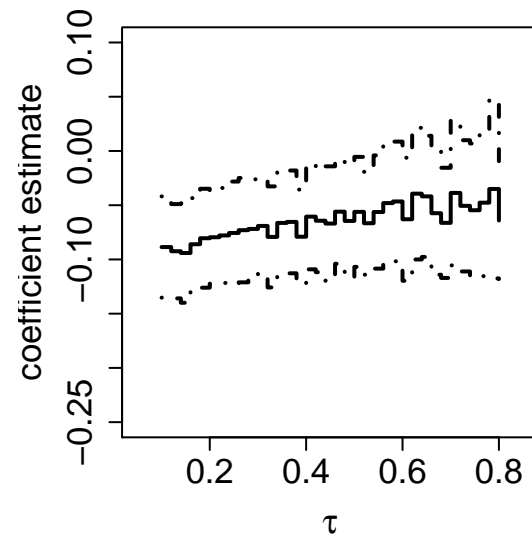**therapy\*sulfouse**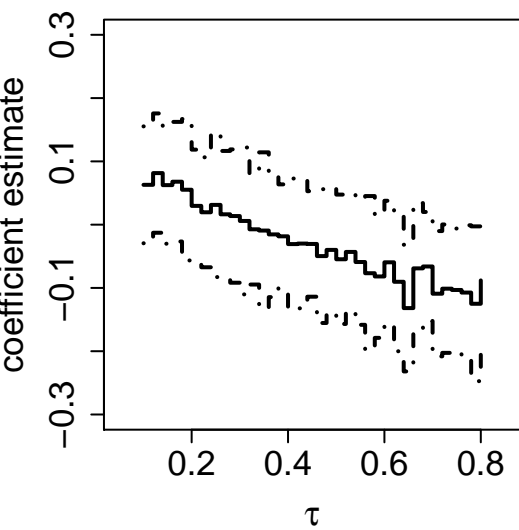**basfglu**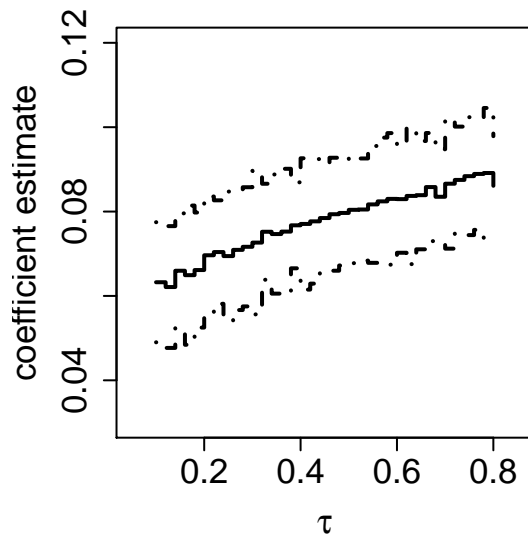**basfins**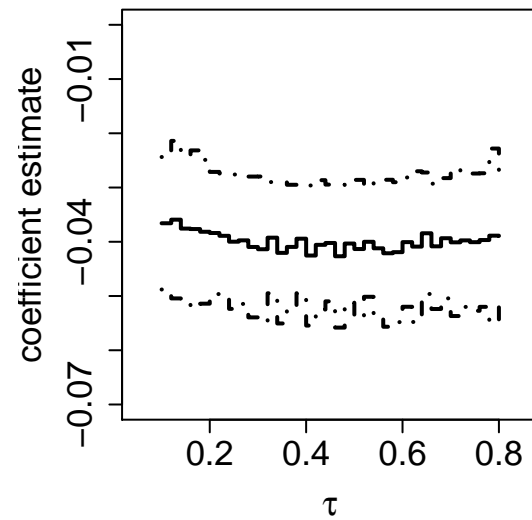

Supplement: Supplementary file 8 [file 1]
